# Supplementary material for: The ROP16III-dependent early immune response determines the subacute CNS immune response and type III Toxoplasma gondii survival
Source: PLoS Pathog. 2019 Oct 24;15(10):e1007856. doi: 10.1371/journal.ppat.1007856 (PMC6812932; doi:10.1371/journal.ppat.1007856)
Supplement: S2 Table — (DOCX) [file ppat.1007856.s008.docx]

**Table S2: List of cells types characterized between type II and type III-infected mice.**

| **Cell type (Brain)** | **Type II** | **Type III** |
| --- | --- | --- |
| **CD3 T cells** | 1.06+0.2x105 | 1.07+0.2x106 |
| **CD4 (CD3+, CD4+) T cells** | 7.4+1.7x105 | 6.4+0.97x105 |
| **Activated CD4 (CD3+, CD4+, CD44+) T cells** | 6.9+1.6x105 | 6.1+0.9x105 |
| **CD8 (CD3+, CD8+) T cells** | 3.2+0.7x105 | 3.1+0.4x105 |
| **Activated CD8 (CD3+, CD8+, CD44+) T cells** | 2.9+0.8x105 | 2.9+0.4x105 |
| **Exhausted (CD3+, CD8+, PD-1+) T cells** | 1.8+0.4x104 | 1.6+0.2x104 |
| **Macrophages (CD45+, F4/80+, CD11bhi, CD11clow/int)** | 1.8+0.4x105 | 2.4+0.3x105 |
|  | | |
| **Cell type (Spleen)** | **Type II** | **Type III** |
| **CD3 T cells** | 1.2+0.08x107 | 1.2+0.2x107 |
| **CD4 (CD3+, CD4+) T cells** | 4.5+0.5x106 | 4.6+0.7x106 |
| **Activated CD4 (CD3+, CD4+, CD44+) T cells** | 2.3+0.2x106 | 2.09+0.3x106 |
| **CD8 (CD3+, CD8+) T cells** | 5.9+0.4x106 | 5.8+0.8x106 |
| **Activated CD8 (CD3+, CD8+, CD44+) T cells** | 3.3+0.3x106 | 2.9+0.3x106 |
| **Exhausted (CD3+, CD8+, PD-1+) T cells** | 5.7+0.8x105 | 8.4+1.2x105 |
| **Macrophages (CD45+, F4/80+, CD11bhi, CD11clow/int)** | 1.5+0.4x106 | 8.4+2.4x105 |
